# Supplementary material for: Role of a 2,3-bis(pyridyl)pyrazinyl chelate bridging ligand in the reactivity of Ru(ii)–Pt(ii) dinuclear complexes on the substitution of chlorides by thiourea nucleophiles – a kinetic study
Source: Royal Society of Chemistry journal article supplement (doi:10.1039/c8nj02096e), 2018-01-01
Supplement: c8nj02096e1.pdf [file c8nj02096e1.pdf]

**Role of 2,3-bis(pyridyl)pyrazinyl chelate bridging ligand on the reactivity of Ru(II)-Pt(II) dinuclear complexes on the substitution of chlorides by thiourea nucleophiles – kinetic study**

Rajesh Bellam\*<sup>a</sup>, Deogratius Jaganyi\*<sup>b</sup>, Allen Mambanda and Ross Robinson

<sup>a</sup> School of Chemistry and Physics, University of KwaZulu-Natal, Private Bag X01, Scottsville, Pietermaritzburg 3209, South Africa. <sup>b</sup> College of Science, University of Rwanda, P.O. Box 4285, Kigali, Rwanda.

ELECTRONIC SUPPLEMENTARY INFORMATION (ESI)

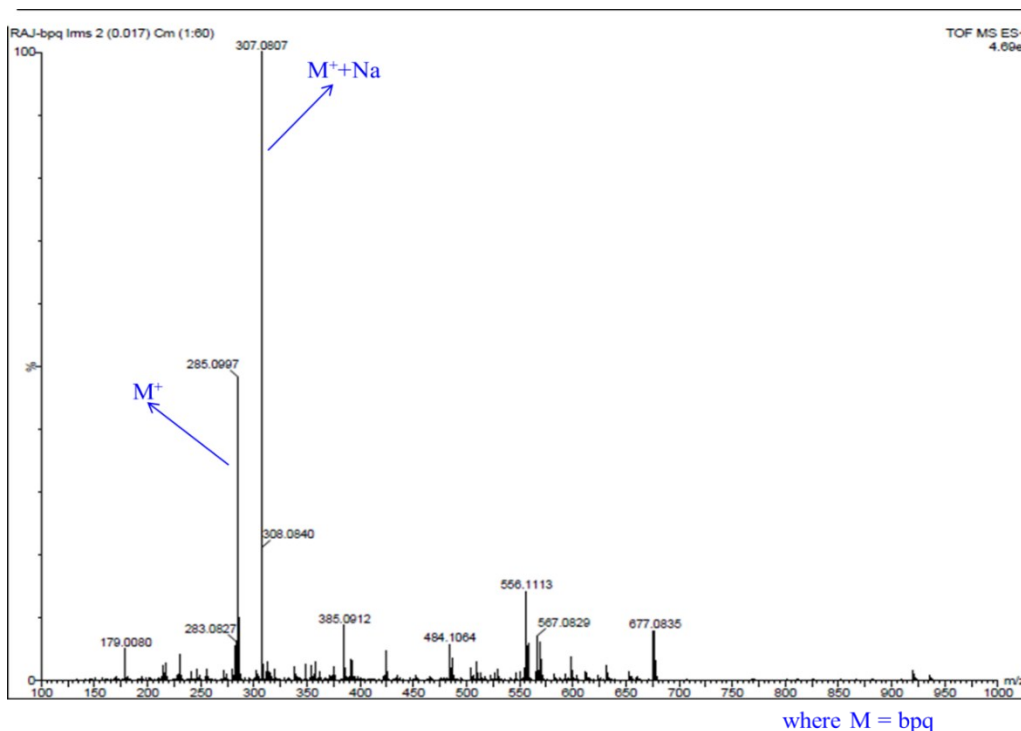

**Figure 1** TOF-MS spectra of 2,3-bis(2'pyriyl)-quinoxaline (bpq).

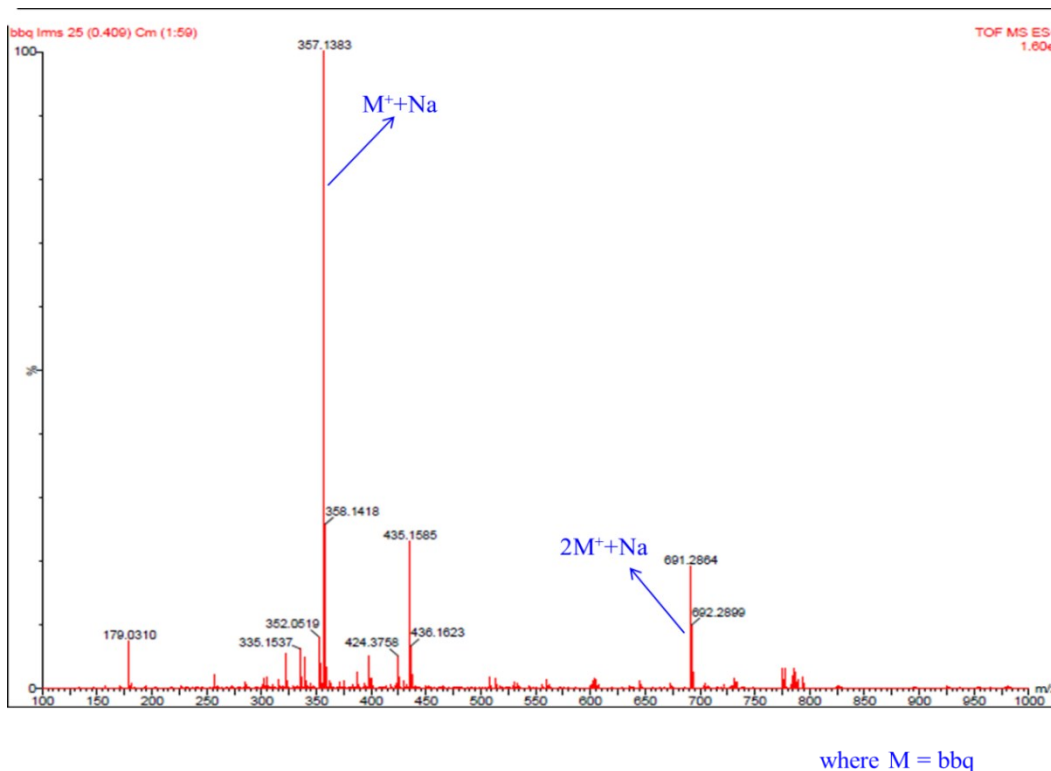

**Figure 2** TOF-MS spectra of 2,3-bis(2'pyriyl)benzo[g]quinoxaline (bbq).

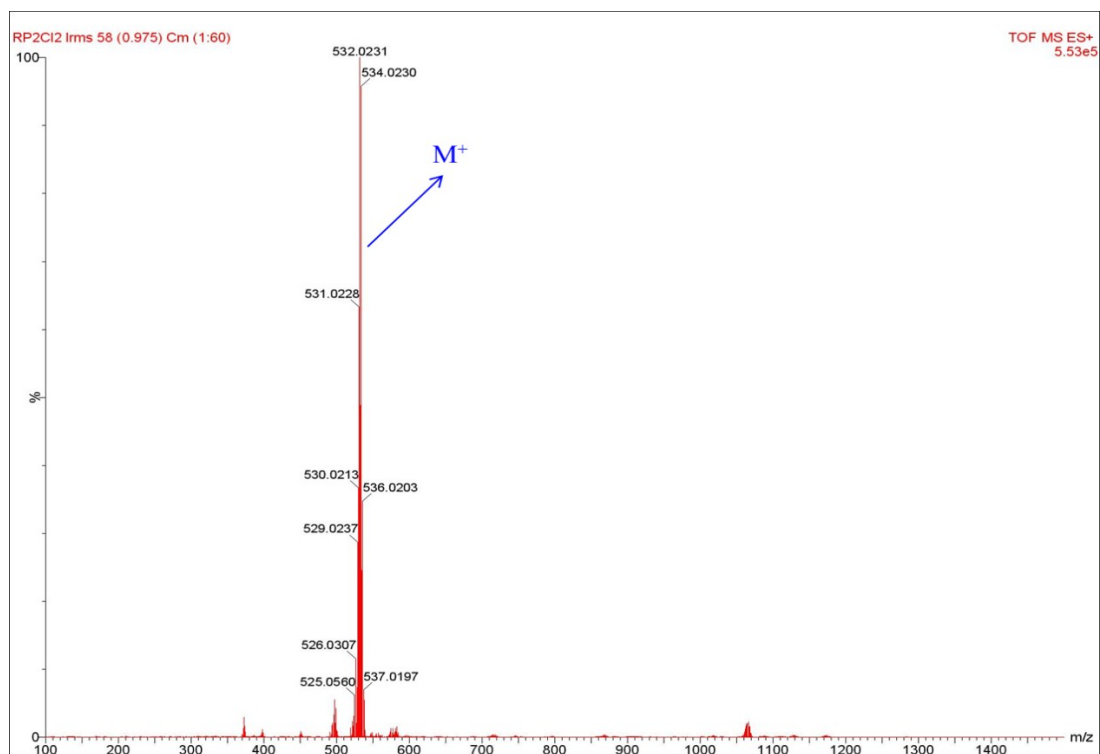

where  $M = (\text{Phen})_2\text{RuCl}_2$

**Figure 3** TOF-MS spectra of  $(\text{phen})_2\text{RuCl}_2$ .

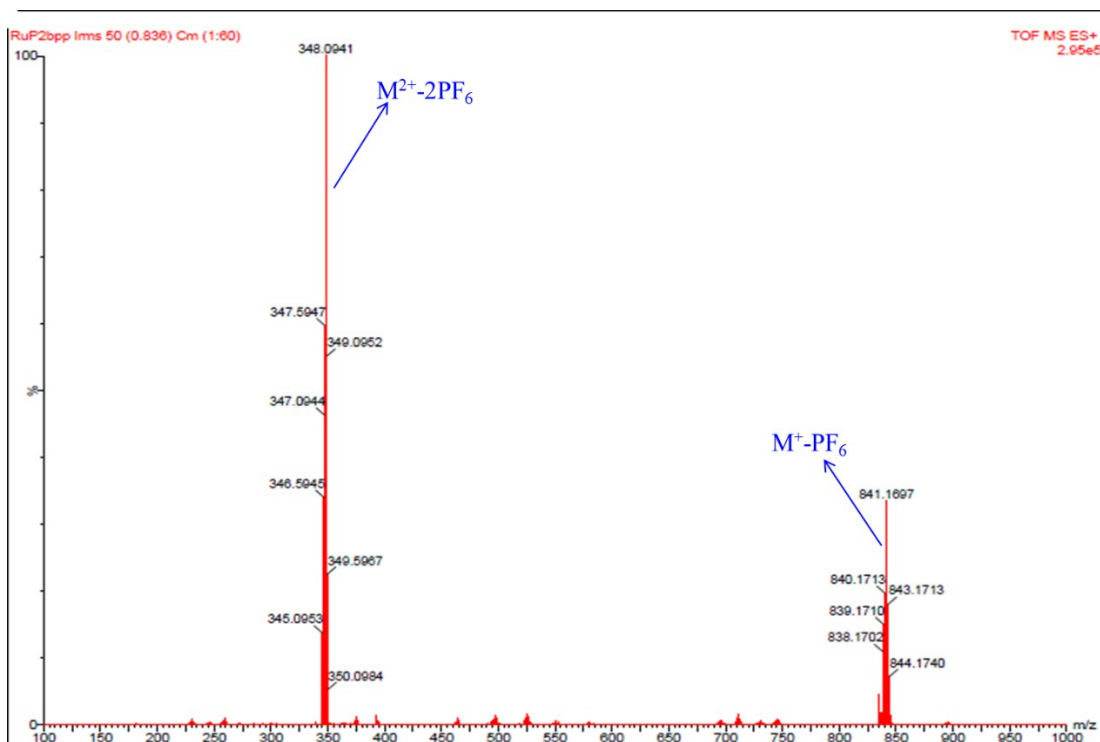

where  $M = [(\text{phen})_2\text{Ru}(\mu\text{-bpp})](\text{PF}_6)_2$

**Figure 4** TOF-MS spectra of  $[(\text{phen})_2\text{Ru}(\mu\text{-bpp})](\text{PF}_6)_2$ .

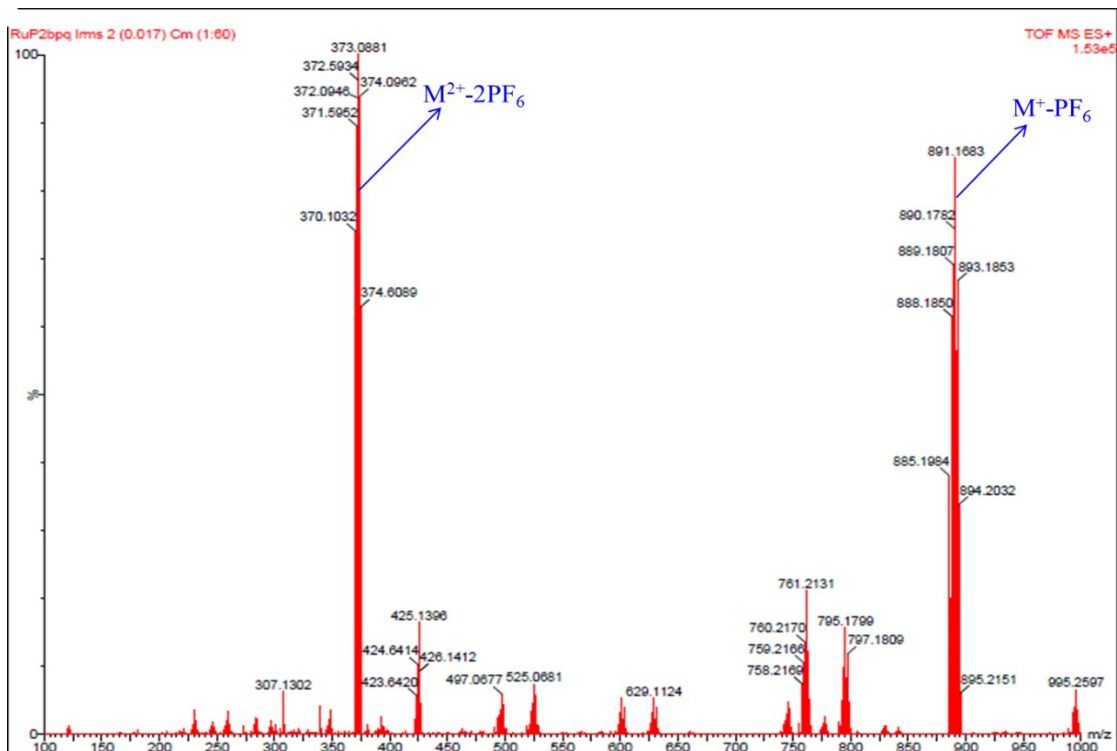

where  $M = [(\text{phen})_2\text{Ru}(\mu\text{-bpq})](\text{PF}_6)_2$

**Figure 5** TOF-MS spectra of  $[(\text{phen})_2\text{Ru}(\mu\text{-bpq})](\text{PF}_6)_2$ .

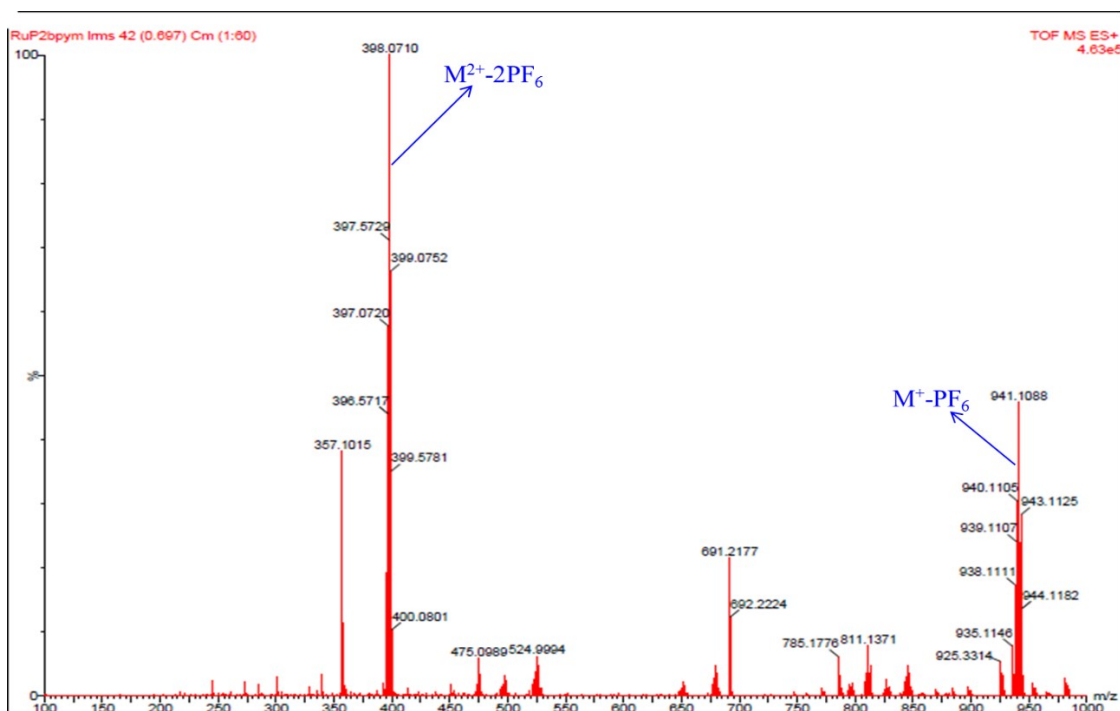

where  $M = [(\text{phen})_2\text{Ru}(\mu\text{-bbq})](\text{PF}_6)_2$

**Figure 6** TOF-MS spectra of  $[(\text{phen})_2\text{Ru}(\mu\text{-bbq})](\text{PF}_6)_2$ .

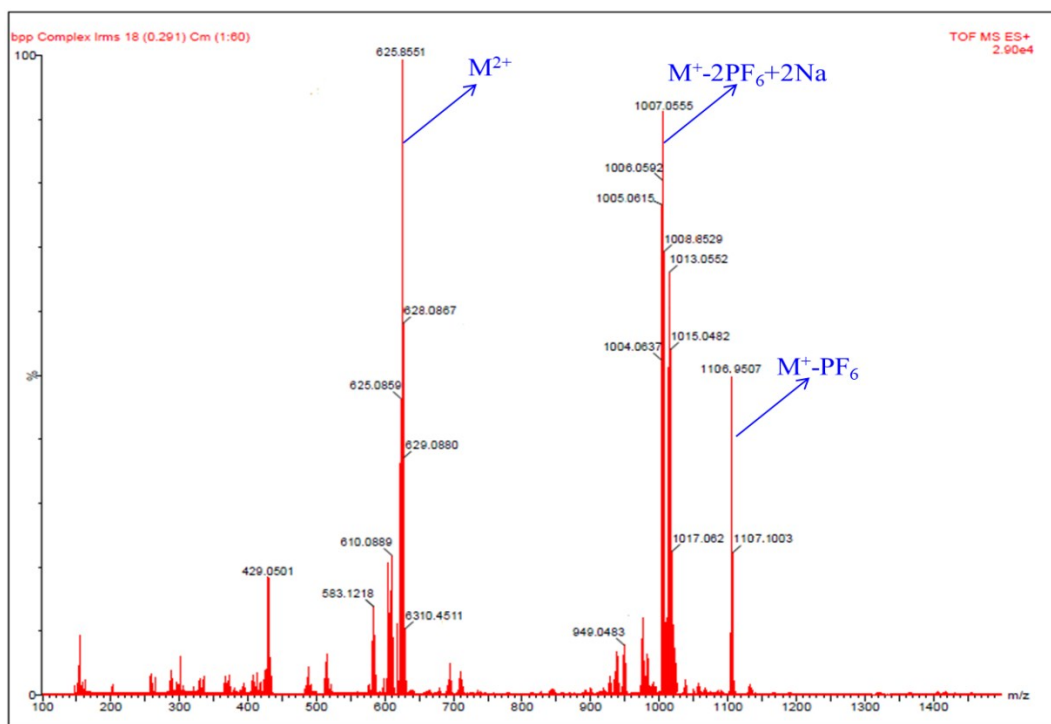

where  $\text{M} = [(\text{phen})_2\text{Ru}(\text{bpp})\text{PtCl}_2](\text{PF}_6)_2$

**Figure 7** TOF-MS spectra of  $[(\text{phen})_2\text{Ru}(\mu\text{-bpp})\text{PtCl}_2](\text{PF}_6)_2$ .

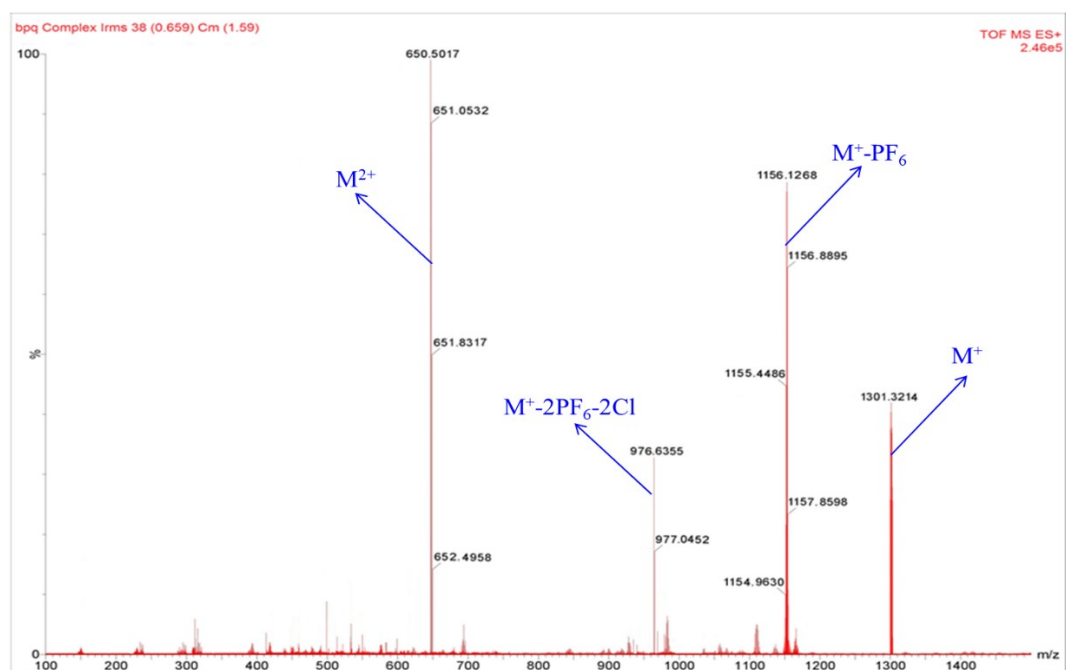

where  $\text{M} = [(\text{phen})_2\text{Ru}(\text{bpq})\text{PtCl}_2](\text{PF}_6)_2$

**Figure 8** TOF-MS spectra of  $[(\text{phen})_2\text{Ru}(\mu\text{-bpq})\text{PtCl}_2](\text{PF}_6)_2$ .

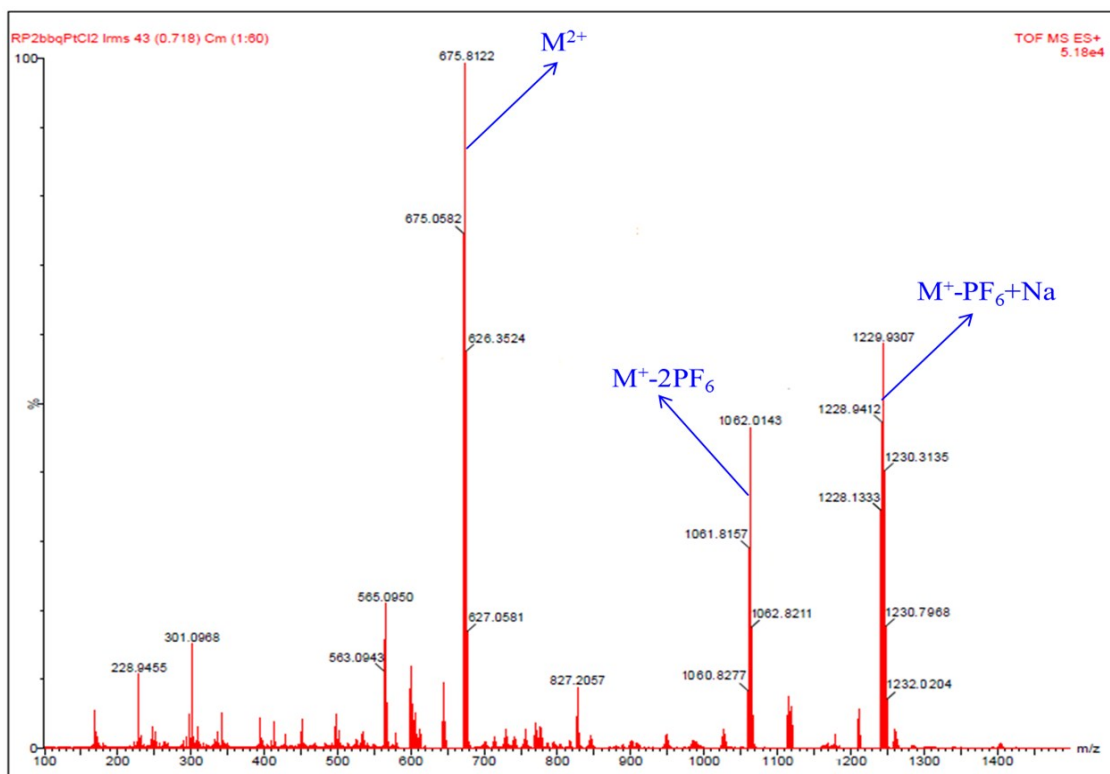

where  $M = [(\text{phen})_2\text{Ru}(\mu\text{-bbq})\text{PtCl}_2](\text{PF}_6)_2$

**Figure 9** TOF-MS spectra of  $[(\text{phen})_2\text{Ru}(\mu\text{-bbq})\text{PtCl}_2](\text{PF}_6)_2$ .

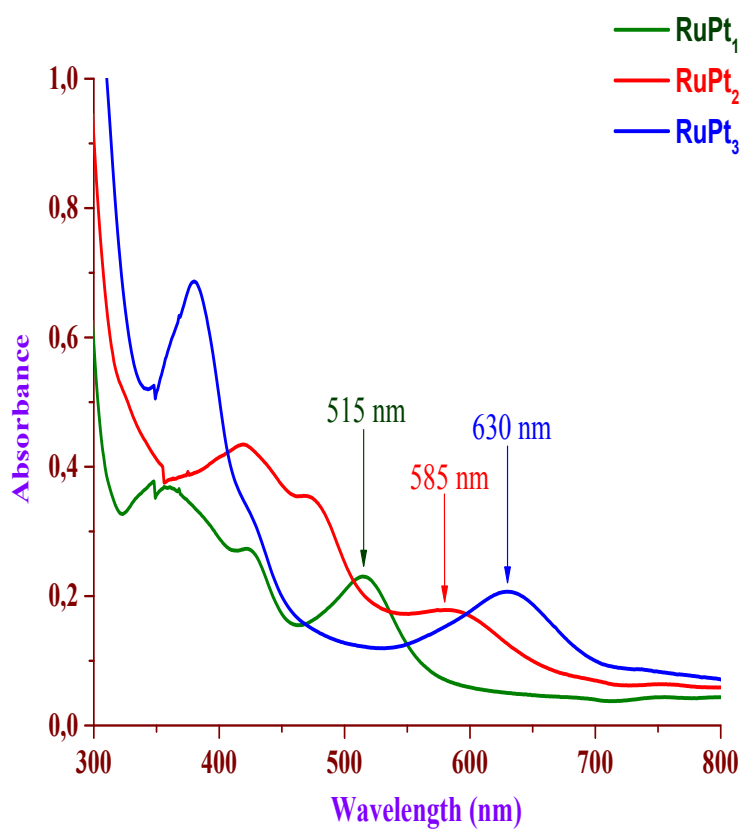

**Figure 10** UV-Visible spectra of **RuPt** complexes ( $[\text{RuPt}] = 5 \times 10^{-5} \text{ M}$  and  $I = 0.1$  in methanol medium)

**Table 1** Summary of the second order rate constants,  $k_2$  for the first and second steps of the title complexes with Nu at different temperatures.

| Complex                 | Nu   | $k_2/\text{M}^{-1} \text{s}^{-1}$ |             |              |              |              |              |
|-------------------------|------|-----------------------------------|-------------|--------------|--------------|--------------|--------------|
|                         |      | First step                        |             |              | Second step  |              |              |
|                         |      | 25 °C                             | 45 °C       | 55 °C        | 25 °C        | 45 °C        | 55 °C        |
| <b>RuPt<sub>1</sub></b> | TU   | 2.19 ± 0.12                       | 9.52 ± 0.19 | 17.24 ± 0.33 | 2.28 ± 0.15  | 7.02 ± 0.19  | 11.53 ± 0.31 |
|                         | DMTU | 0.58 ± 0.07                       | 2.28 ± 0.16 | 4.28 ± 0.21  | 0.63 ± 0.09  | 2.24 ± 0.14  | 4.29 ± 0.24  |
|                         | TMTU | 0.02 ± 0.03                       | 0.16 ± 0.09 | 0.38 ± 0.18  | 0.008 ± 0.05 | 0.08 ± 0.07  | 0.18 ± 0.15  |
| <b>RuPt<sub>2</sub></b> | TU   | 90.11 ± 0.4                       | 244.17 ± 1  | 385.67 ± 1   | 7.00 ± 0.10  | 32.64 ± 0.3  | 64.00 ± 0.3  |
|                         | DMTU | 66.67 ± 0.3                       | 167.54 ± 1  | 262.86 ± 1   | 2.76 ± 0.08  | 9.27 ± 0.18  | 15.12 ± 0.27 |
|                         | TMTU | 9.24 ± 0.16                       | 32.22 ± 0.3 | 56.23 ± 0.5  | 1.73 ± 0.05  | 4.95 ± 0.11  | 8.04 ± 0.16  |
| <b>RuPt<sub>3</sub></b> | TU   | 321.05 ± 1                        | 758.33 ± 2  | 1110.02 ± 3  | 8.83 ± 0.14  | 47.47 ± 0.31 | 96.16 ± 0.62 |
|                         | DMTU | 197.08 ± 1                        | 465.09 ± 1  | 692.26 ± 2   | 3.39 ± 0.11  | 18.11 ± 0.20 | 31.69 ± 0.29 |
|                         | TMTU | 12.07 ± 0.22                      | 41.05 ± 0.7 | 66.75 ± 0.5  | 1.94 ± 0.06  | 6.72 ± 0.16  | 10.76 ± 0.22 |

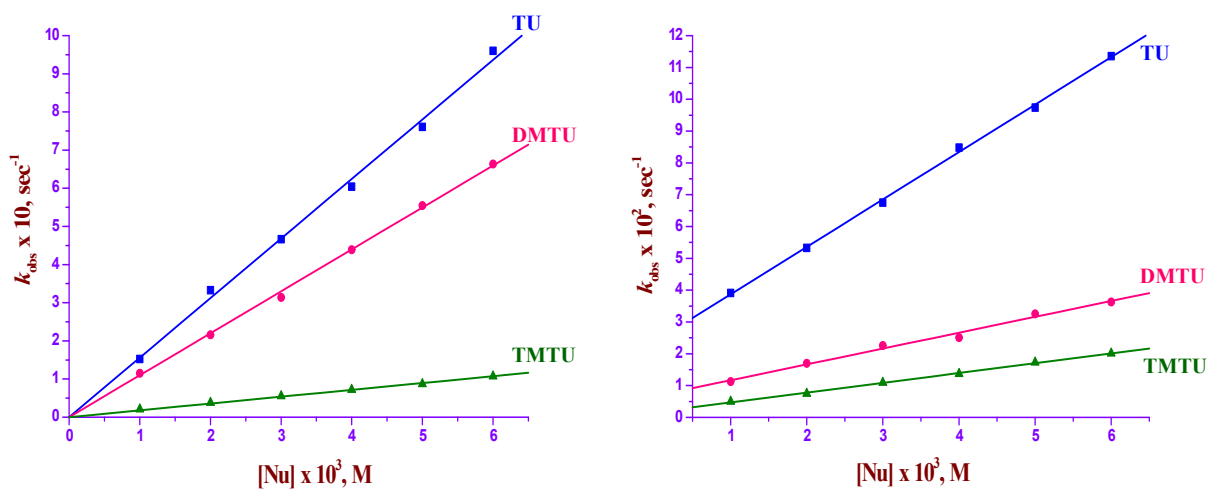

**Figure 11** Dependence of the pseudo-first-order rate constants,  $k_{\text{obs}}^{1\text{st}}$  (a) and  $k_{\text{obs}}^{2\text{nd}}$  (b) on  $[\text{Nu}]$  of the reaction with **RuPt<sub>2</sub>** ( $5 \times 10^{-5} \text{ M}$ ) in methanol medium,  $I = 0.1 \text{ M}$  ( $\text{NaClO}_4$ ) at  $T = 35 \text{ }^\circ\text{C}$

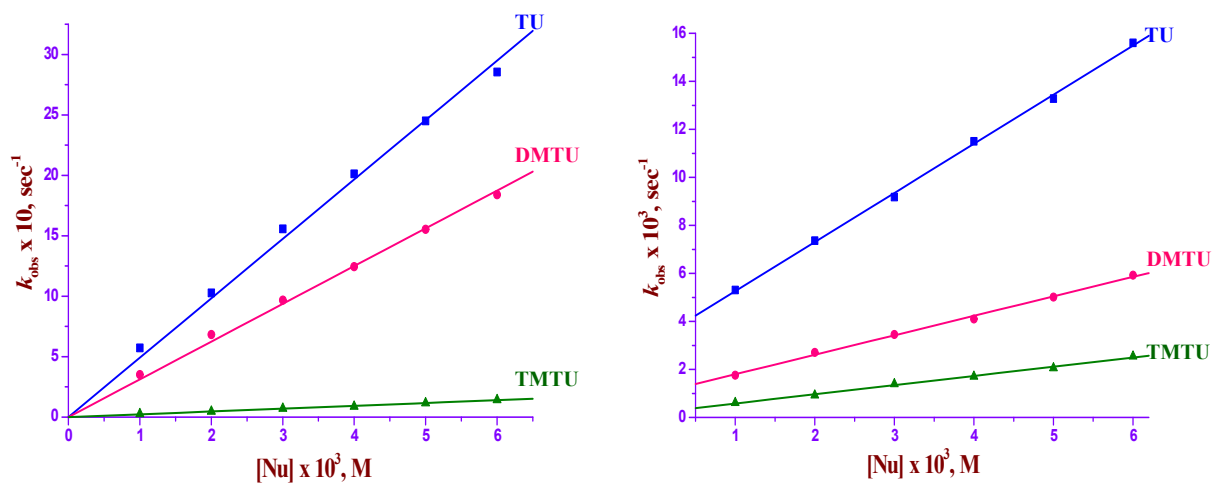

**Figure 12** Dependence of the pseudo-first-order rate constants,  $k_{\text{obs}}^{\text{1st}}$  (a) and  $k_{\text{obs}}^{\text{2nd}}$  (b) on [Nu] of the reaction with  $\text{RuPt}_3$  ( $5 \times 10^{-5} \text{ M}$ ) in methanol medium,  $I = 0.1 \text{ M}$  ( $\text{NaClO}_4$ ) at  $T = 35 \text{ }^\circ\text{C}$

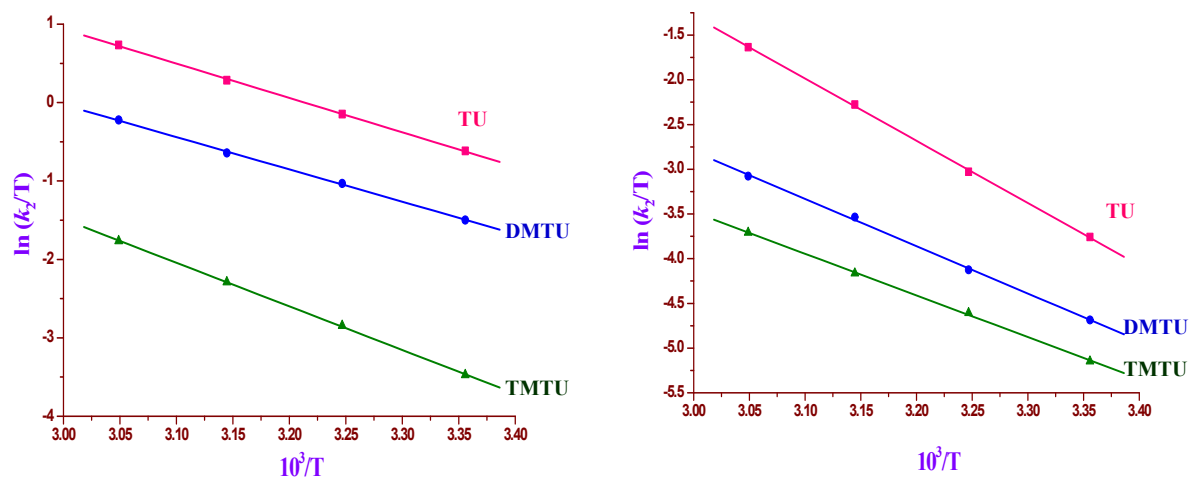

**Figure 13** Eyring plots for the first (a) and second steps (b) for the substitution reaction of  $\text{RuPt}_2$  by thiourea nucleophiles.

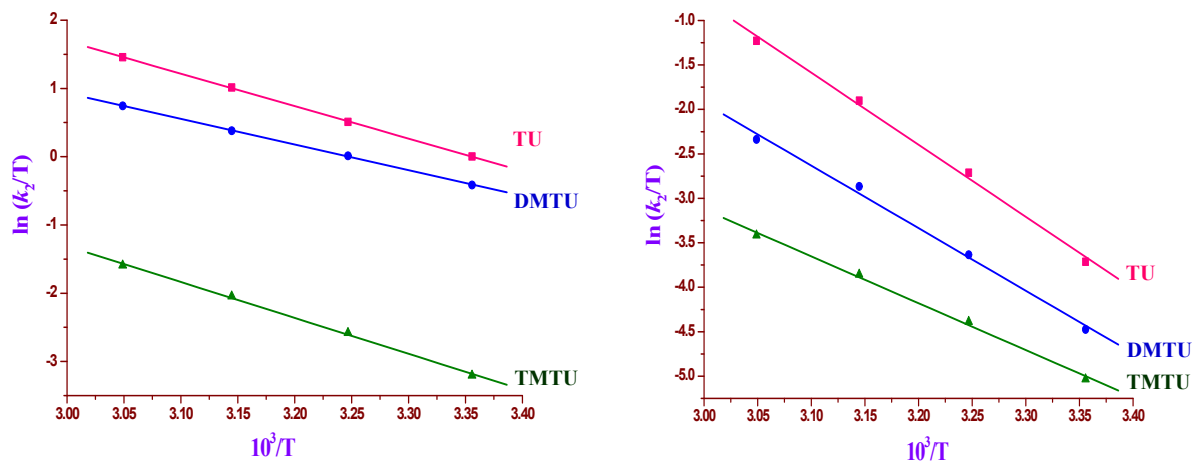

**Figure 14** Eyring plots for the first (a) and second steps (b) for the substitution reaction of  $\text{RuPt}_3$  by thiourea nucleophiles.

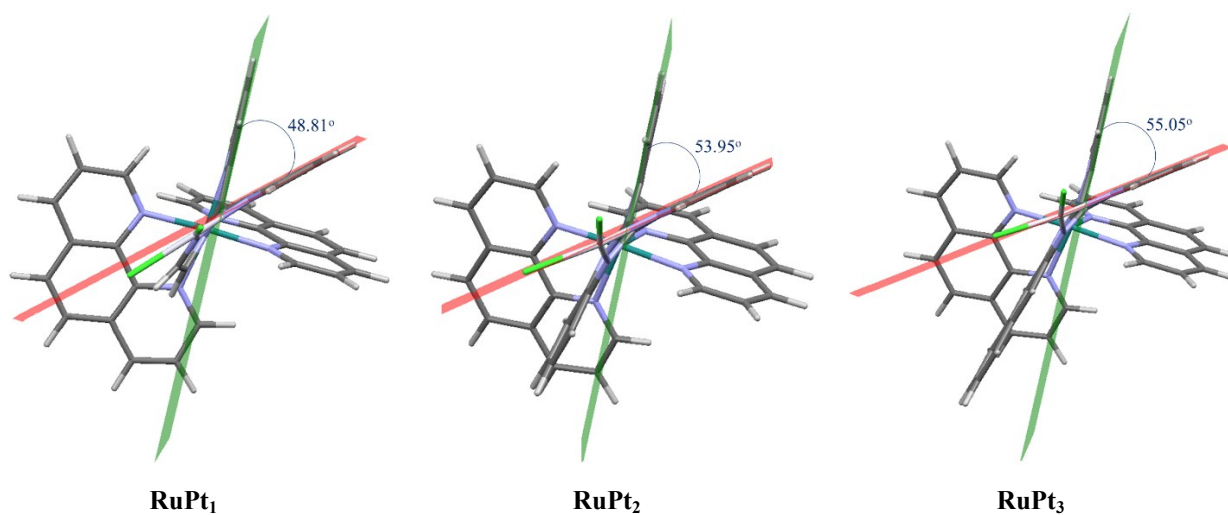

**Figure 15** DFT-optimized structure of  $\text{RuPt}$  complexes showing the interplane angles between the planes passing through bridged pyridyl rings.
